# Supplementary material for: Wastewater-Based Surveillance of Antibiotic Resistance Genes Associated with Tuberculosis Treatment Regimen in KwaZulu Natal, South Africa
Source: MDPI journal article supplement (doi:10.3390/antibiotics10111362), 2021-11-08
Supplement: s1 [file s1]

**Table S1:** Target resistant genes and their PCR primer sequences

| Target gene- locus | Annotation                               | Drug name  | Primer sequence                | References       |
|--------------------|------------------------------------------|------------|--------------------------------|------------------|
| rpoB               | DNA-directed RNA polymerase subunit beta | Rifampicin | F:5'-CGAGGTGCCGGTGGAAAC-3'     | [71; 72; 24; 10] |
|                    |                                          |            | R:5'-GTCGTCTGTGCTCCAGGAAGG-3'  |                  |
| KatG               | catalase-peroxidase                      | Isonizaid  | F:5'-GAGCCCGATGAGGTCTATTG-3'   | [71; 72; 24; 10] |
|                    |                                          |            | R:5'-GTCCTTGGCGGTGTATTGC-3'    |                  |
| inhA               | NADH-dependent enoyl-[ACP] reductase     |            | F:5'-GAGCGTAACCCCAAGTGCAGAA-3' | [24; 10]         |
|                    |                                          |            | R:5'-TCCGGTAACCAGGACTGAAC-3'   |                  |
| embB               | arabinylosyltransferase                  | Ethambutol | F:5'-CATGTCATCGGCGCGAATTTCG-3' | [10]             |
|                    |                                          |            | R:5'-TGGCAGGCGCATCCACAGACT-3'  |                  |

|             |                                                |                            |                               |         |
|-------------|------------------------------------------------|----------------------------|-------------------------------|---------|
| PncA        | pyrazinamidase/nicotinamidase<br>PncA          | Pyrazinamide               | F:5'-GACGTATGCGGGCGTTGA-3'    | [71;72] |
|             |                                                |                            | R:5'-CCATCAGGAGCTGCAAACCA-3'  |         |
| gyrA        | DNA gyrase subunit A                           | Ofloxacin,<br>Moxifloxacin | F:5'-GGTGCTCTATGAAATGTTCG-3'  | [24]    |
|             |                                                |                            | R:5'-GCTTCGGTGTACCTCATCG-3'   |         |
| gyrB        | DNA gyrase subunit B                           |                            | F:5'-CGATGTTCCAGGCGATACTT-3'  | [24]    |
|             |                                                |                            | R:5'-ATCTTGTGGTAGCGCAGCTT-3'  |         |
| rrs         | 16S ribosomal RNA                              | Kanamycin,<br>Amikacin     | F:5'-GTAATCGCAGATCAGCAACG-3'  | [24;10] |
|             |                                                |                            | R:5'-TTTTCGTGGTGCTCCTTAGAA-3' |         |
| eis         | enhanced intracellular survival<br>protein     | Amikacin,<br>Kanamycin     | F:5'-AAATTCGTCGCTGATTCTCG-3'  | [24]    |
|             |                                                |                            | R:5'-CGCGACGAAACTGAGACC-3'    |         |
| rpsL or rrs | 30S ribosomal protein S12/16S<br>ribosomal RNA | Streptomycin               | F:5'-GCGCCCAAGATAGAAAG-3'     | [10]    |

|        |                                         |             |                                   |      |
|--------|-----------------------------------------|-------------|-----------------------------------|------|
|        |                                         |             | R:5'-CAACTGCGATCCGTAGA-3'         |      |
| ddn    | deazaflavin-dependent<br>nitroreductase | Delamanid   | F:5'-CGAGCGCACCGACCAGAGC-3'       | [63] |
|        |                                         |             | R:5'-GCATGGCCCCGCAGGTGGACAA-3'    |      |
| fbiA   | 2-phospho-L-lactate<br>transferase      |             | F:5'-GCGGTTCTGTTGTGGTTGGG-3'      | [63] |
|        |                                         |             | R:5'-CCGATGACGGGCAGGATCTCGATGG-3' |      |
| fgd1   | F420-dependent glucose-6-<br>phosphate  |             | F:5'-CGTGGCCGCGAGCGAGGTGAA-3'     |      |
|        |                                         |             | R:5'-CGCCCCGAACCGTCAACAACACTGG-3' |      |
| Rv0678 | hypothetical protein                    | Bedaquiline | F:5'-GTATCCAGGCACGCTTGA-3'        | [63] |
|        |                                         |             | R:5'-CCCCACAATCGATAACC-3'         |      |
| atpE   | ATP synthase subunit C                  |             | F:5'-GTACTTCAGCCAAGCGATGG-3'      | [63] |
|        |                                         |             | R:5'-CCGTTGGGAATGAGGAAGTTG-3'     |      |

|      |                                    |             |                                                 |      |
|------|------------------------------------|-------------|-------------------------------------------------|------|
| ethA | monooxygenase EthA                 | Ethionamide | F:5'-CCTGGCAGCTTACTACGTGTC-3                    | [75] |
|      |                                    |             | R:5'-CGGCATCATCGTCGTCTG-3'                      |      |
| ethR | HTH-type transcriptional repressor |             | F:5'-TTTTCCAGGATGGCGTAGC-3'                     | [75] |
|      |                                    |             | R:5'-CCGACCGGATCGTCAACA-3'                      |      |
| alr  | alanine racemase                   | Cycloserine | F:5'-<br>GAAAATAAAAGACACGCCTACTTTCGCTCCA-<br>3' | [70] |
|      |                                    |             | R:5'-GACATCCATCGCCATGGCAATACCCTT-3'             |      |

**Table S2:** Median ( $\pm$ SD) Log10 concentrations of the antimicrobial resistance genes measured in the influent and effluent wastewater.

| Gene        | WWTP A            |                   | Mean log reduction     | WWTP B            |                   | Mean log reduction     | WWTP C            |                   | Mean log reduction     |
|-------------|-------------------|-------------------|------------------------|-------------------|-------------------|------------------------|-------------------|-------------------|------------------------|
|             | Influent          | Effluent          |                        | Influent          | Effluent          |                        | Influent          | Effluent          |                        |
| <i>katG</i> | 2.36( $\pm$ 0.07) | 2.43( $\pm$ 0.15) | -<br>0.06( $\pm$ 0.21) | 2.62( $\pm$ 0.19) | 2.61( $\pm$ 0.30) | 0.01( $\pm$ 0.12)      | 2.38( $\pm$ 0.12) | 2.36( $\pm$ 0.08) | 0.02( $\pm$ 0.20)      |
| <i>rpoB</i> | 3.00( $\pm$ 0.20) | 2.11( $\pm$ 0.18) | 0.90( $\pm$ 0.37)      | 3.83( $\pm$ 0.04) | 2.36( $\pm$ 0.18) | 1.46( $\pm$ 0.15)      | 2.17( $\pm$ 0.08) | 1.55( $\pm$ 0.43) | 0.62( $\pm$ 0.36)      |
| <i>embB</i> | 3.78( $\pm$ 0.10) | 3.05( $\pm$ 0.08) | 0.73( $\pm$ 0.16)      | 3.34( $\pm$ 0.10) | 3.11( $\pm$ 0.15) | 0.23( $\pm$ 0.17)      | 3.74( $\pm$ 0.04) | 3.14( $\pm$ 0.06) | 0.60( $\pm$ 0.04)      |
| <i>pncA</i> | 2.16( $\pm$ 0.06) | 1.86( $\pm$ 0.09) | 0.30( $\pm$ 0.15)      | 2.04( $\pm$ 0.20) | 2.00( $\pm$ 0.19) | 0.04( $\pm$ 0.20)      | 1.90( $\pm$ 0.26) | 2.09( $\pm$ 0.01) | -<br>0.19( $\pm$ 0.26) |
| <i>rrs</i>  | 5.18( $\pm$ 0.01) | 4.37( $\pm$ 0.02) | 0.81( $\pm$ 0.01)      | 4.71( $\pm$ 0.06) | 4.58( $\pm$ 0.01) | 0.14( $\pm$ 0.07)      | 4.73( $\pm$ 0.01) | 4.67( $\pm$ 0.06) | 0.07( $\pm$ 0.05)      |
| <i>gyrA</i> | 2.95( $\pm$ 0.05) | 2.08( $\pm$ 0.05) | 0.87( $\pm$ 0.10)      | 2.94( $\pm$ 0.09) | 2.53( $\pm$ 0.13) | 0.42( $\pm$ 0.11)      | 3.23( $\pm$ 0.25) | 2.75( $\pm$ 0.11) | 0.47( $\pm$ 0.23)      |
| <i>gyrB</i> | 4.51( $\pm$ 0.04) | 4.01( $\pm$ 0.07) | 0.50( $\pm$ 0.10)      | 1.82( $\pm$ 0.11) | 3.31( $\pm$ 1.09) | -<br>1.49( $\pm$ 1.15) | 4.26( $\pm$ 0.03) | 4.07( $\pm$ 0.03) | 0.19( $\pm$ 0.02)      |
| <i>atpE</i> | 4.21( $\pm$ 0.07) | 3.27( $\pm$ 0.03) | 0.94( $\pm$ 0.09)      | 3.41( $\pm$ 0.96) | 3.68( $\pm$ 0.07) | -<br>0.27( $\pm$ 0.89) | 4.05( $\pm$ 0.08) | 3.51( $\pm$ 0.15) | 0.54( $\pm$ 0.16)      |
| <i>ethR</i> | 3.40( $\pm$ 0.06) | 3.56( $\pm$ 0.09) | -<br>0.16( $\pm$ 0.15) | 3.56( $\pm$ 0.06) | 3.91( $\pm$ 0.06) | -<br>0.35( $\pm$ 0.03) | 3.67( $\pm$ 0.03) | 4.14( $\pm$ 0.01) | -<br>0.47( $\pm$ 0.04) |
| <i>eis</i>  | 4.30( $\pm$ 0.09) | 3.65( $\pm$ 0.09) | 0.65( $\pm$ 0.18)      | 4.13( $\pm$ 0.13) | 4.01( $\pm$ 0.09) | 0.12( $\pm$ 0.05)      | 3.88( $\pm$ 0.07) | 4.07( $\pm$ 0.09) | -<br>0.19( $\pm$ 0.07) |

### WWTP A

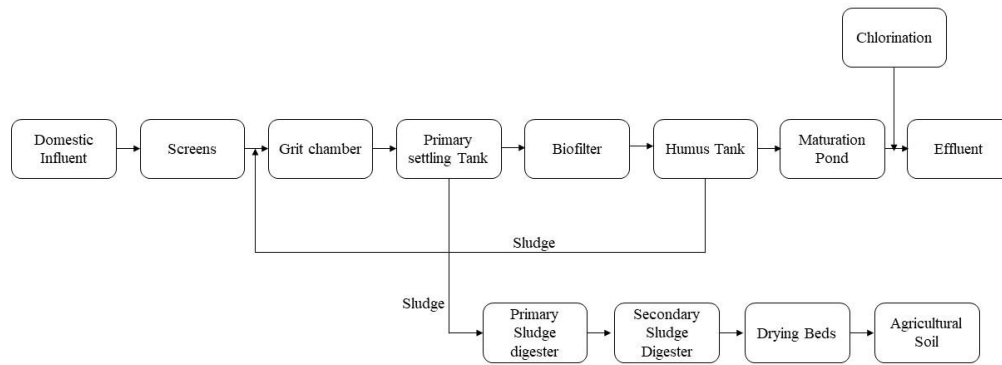

**Figure S1:** A schematic diagram of the Isipingo wastewater treatment plant in Durban, South Africa

### WWTP B

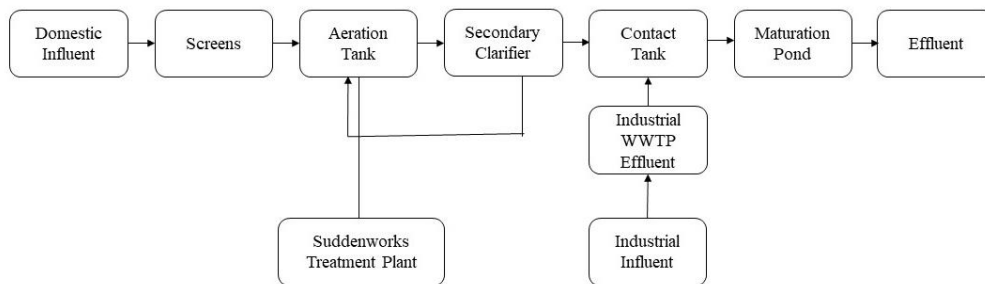

**Figure S2:** A schematic diagram of the Shallcross (also known as UMhlatuzana) wastewater treatment plant in Durban, South Africa

## WWTP C

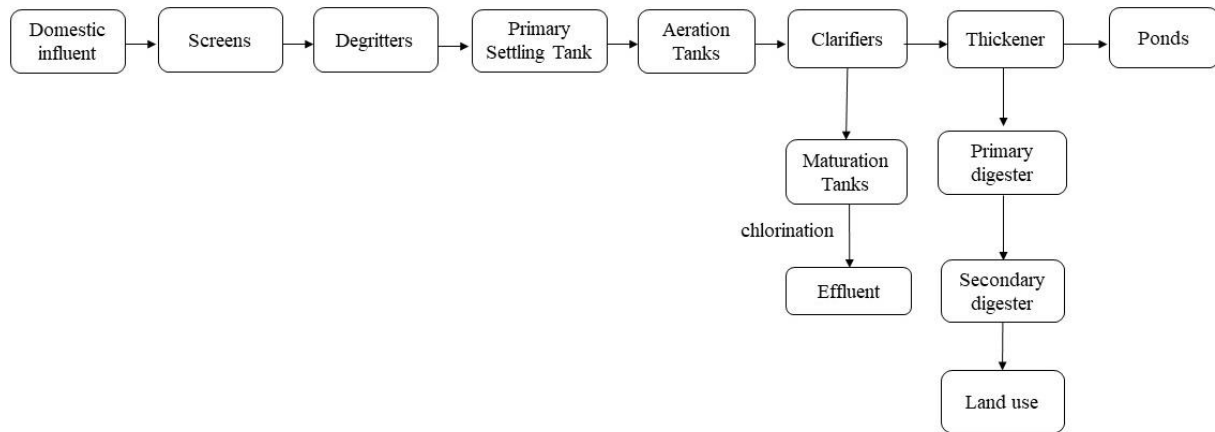

**Figure S3:** A schematic diagram of the Northern works wastewater treatment plant in Durban, South Africa
